# Supplementary material for: The relationship between lipoprotein(a) and risk of cardiovascular disease: a Mendelian randomization analysis
Source: PubMed Central journal article supplement (PMC9608881; doi:10.1186/s40001-022-00825-6), 2022-10-27

ct on Aortic aneurysm || id:finn-b-19\_AORTANEUR

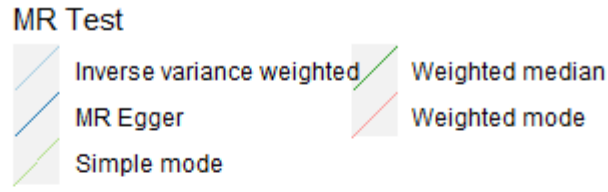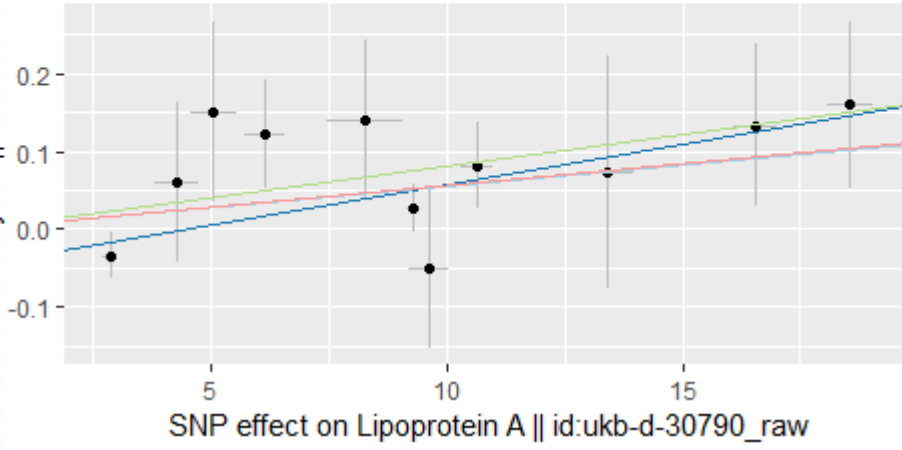

ffect on Atrial fibrillation || id:ebi-a-GCST006414

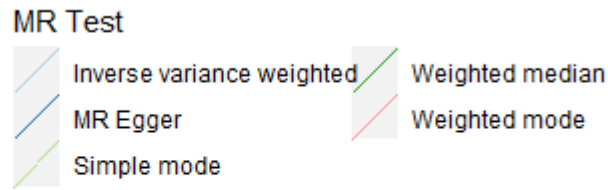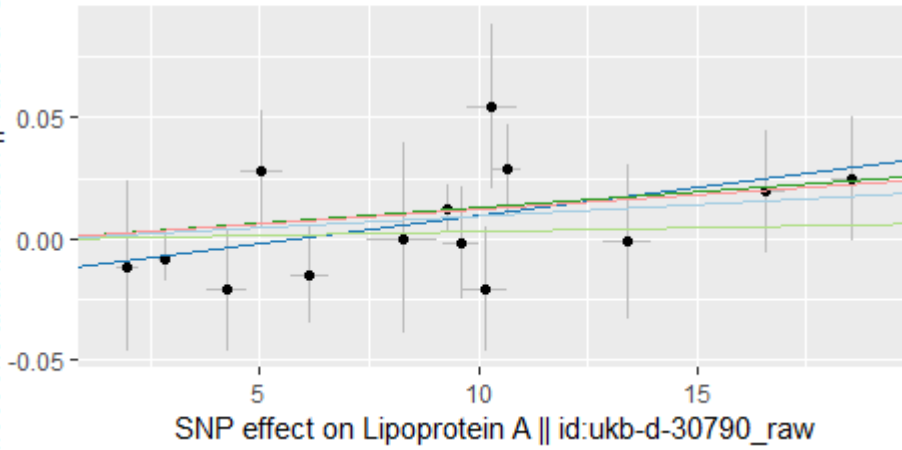

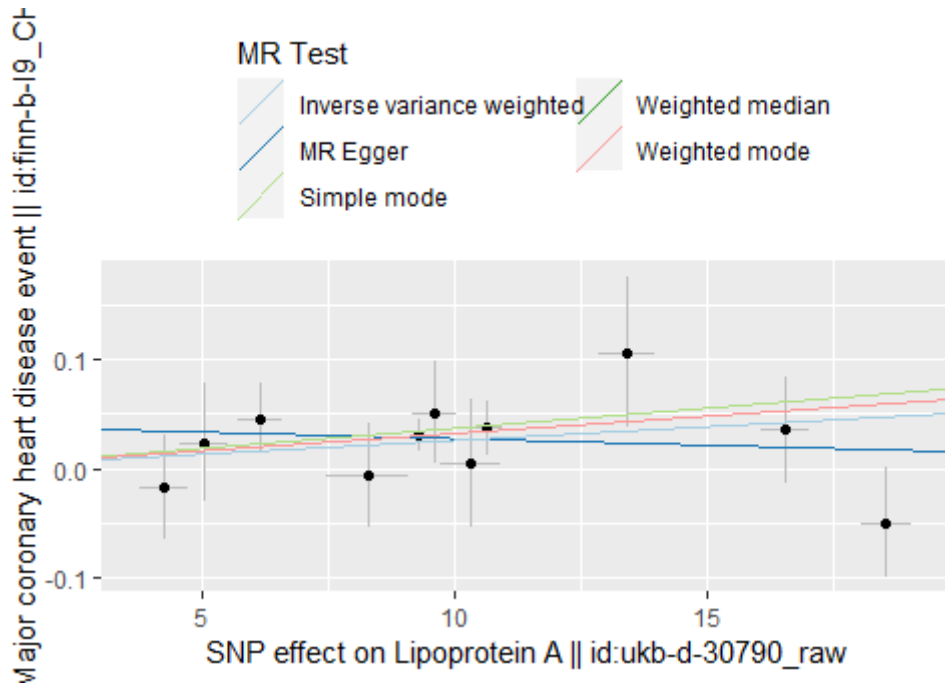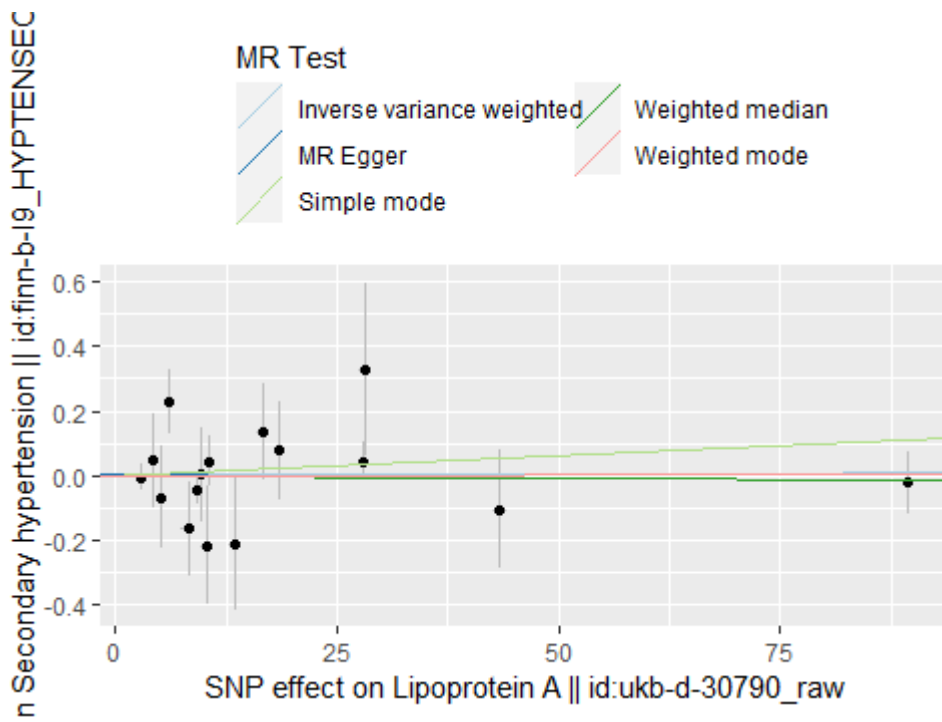

Effect on Heart failure, strict || id:finn-b-19\_HEARTFAIL

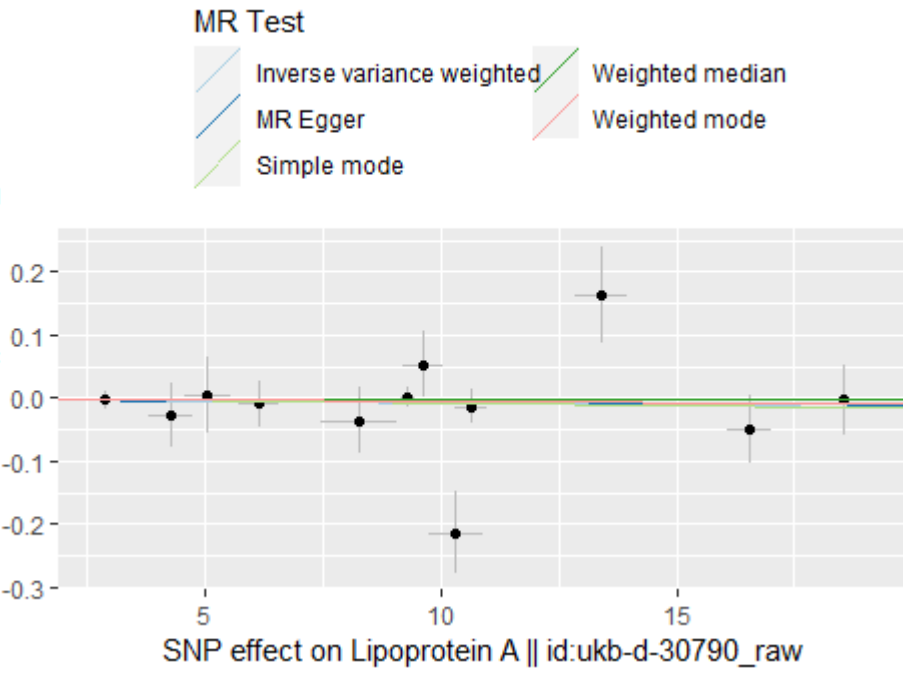

Effect on Stroke, excluding all haemorrhages || id:finn-b-19\_S

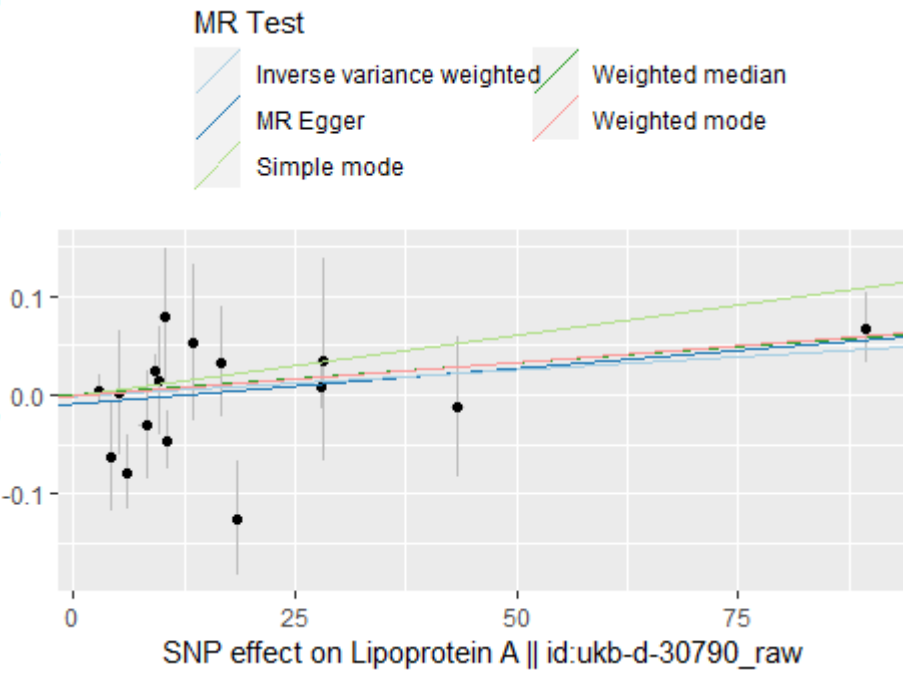

ic stroke (large artery atherosclerosis) || id:ebi-a-GCS

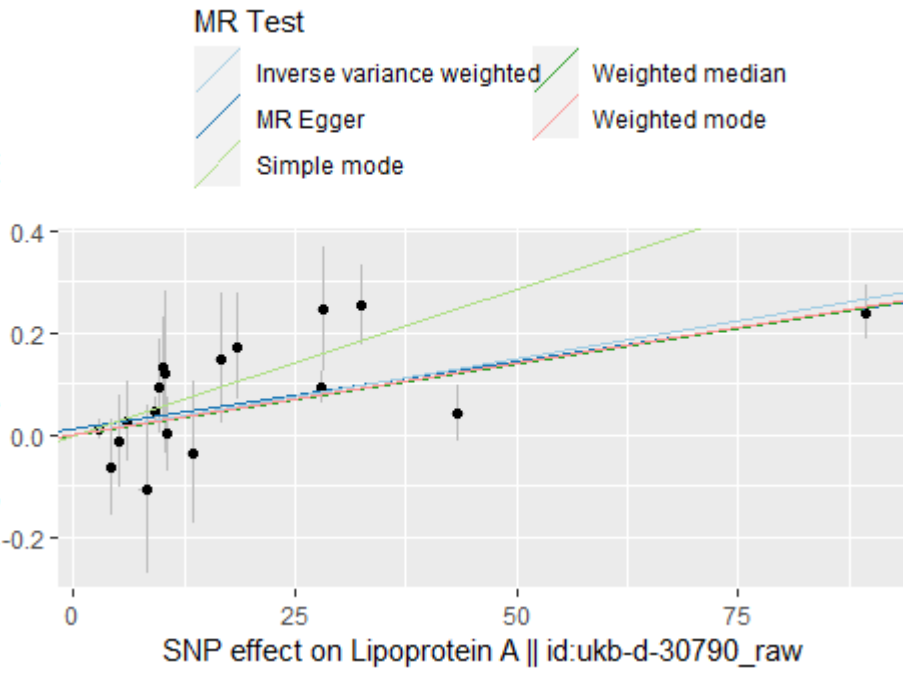

Ischemic stroke (small-vessel) || id:ebi-a-GCST0069C

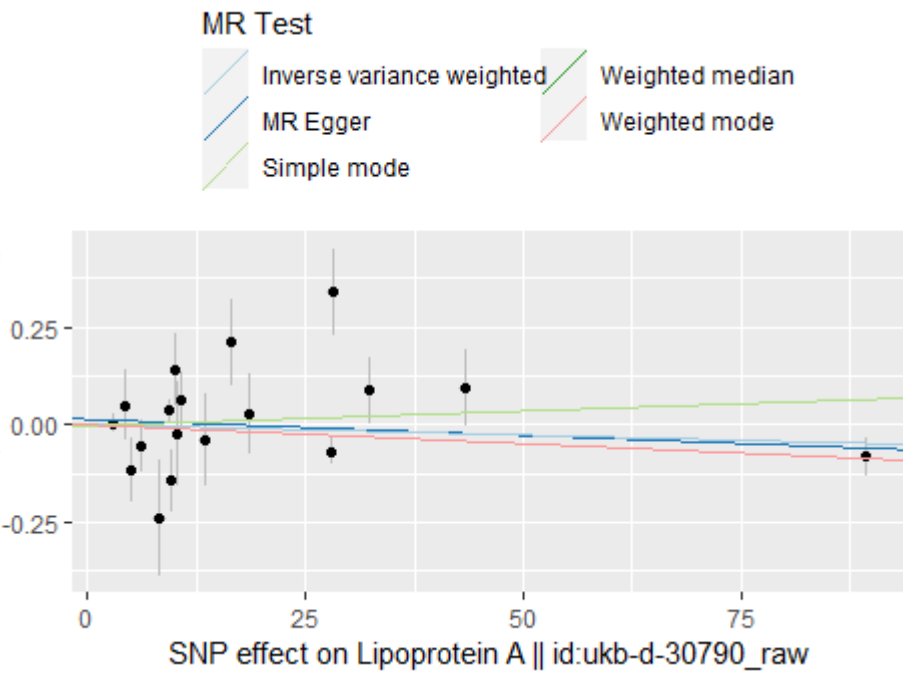

fect on Lacunar stroke || id:ebi-a-GCST90014122

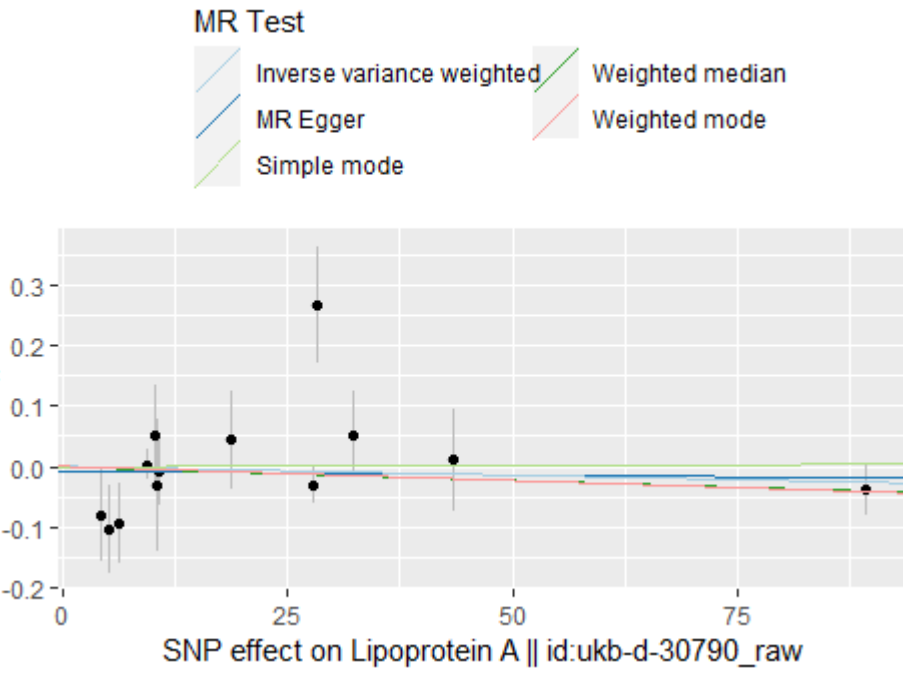

on Pulmonary embolism || id:finn-b-19\_PULMEMB

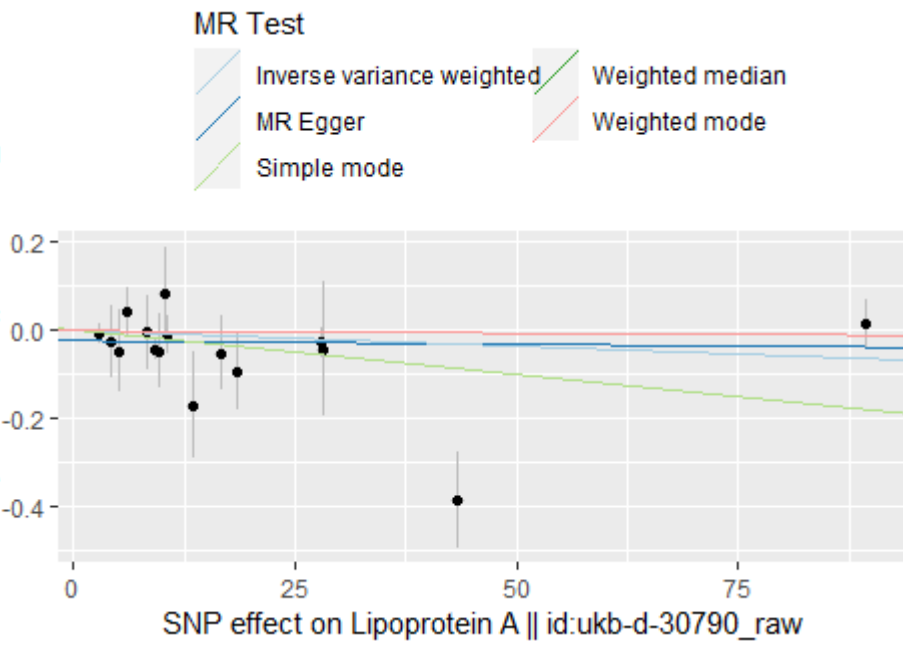

Supplement: 40001_2022_825_MOESM1_ESM.pdf [file 40001_2022_825_MOESM1_ESM.pdf]
