# Supplementary material for: The relationship between lipoprotein(a) and risk of cardiovascular disease: a Mendelian randomization analysis
Source: PubMed Central journal article supplement (PMC9608881; doi:10.1186/s40001-022-00825-6), 2022-10-27

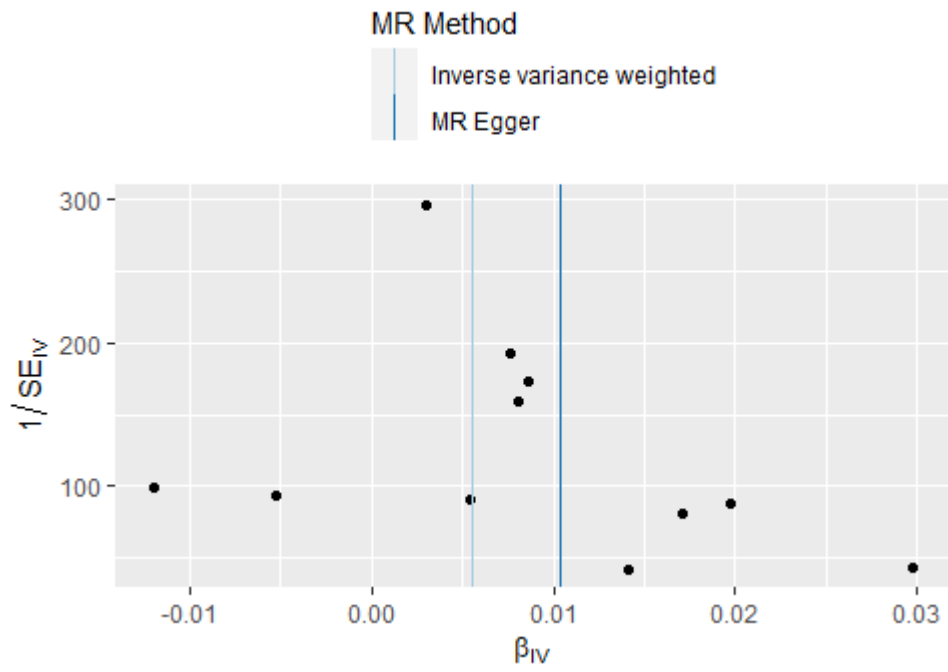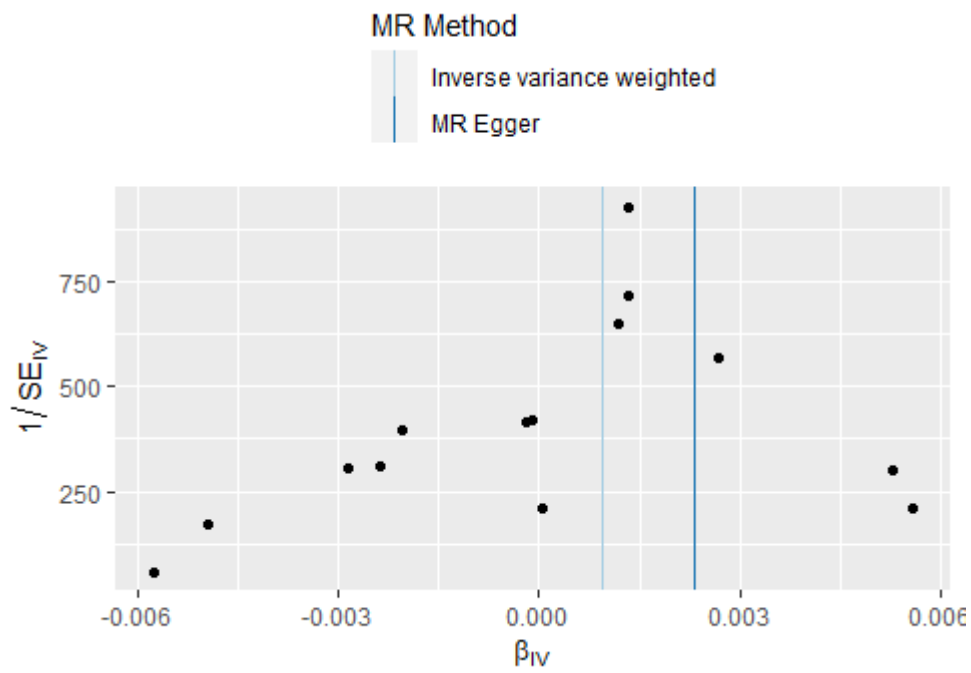

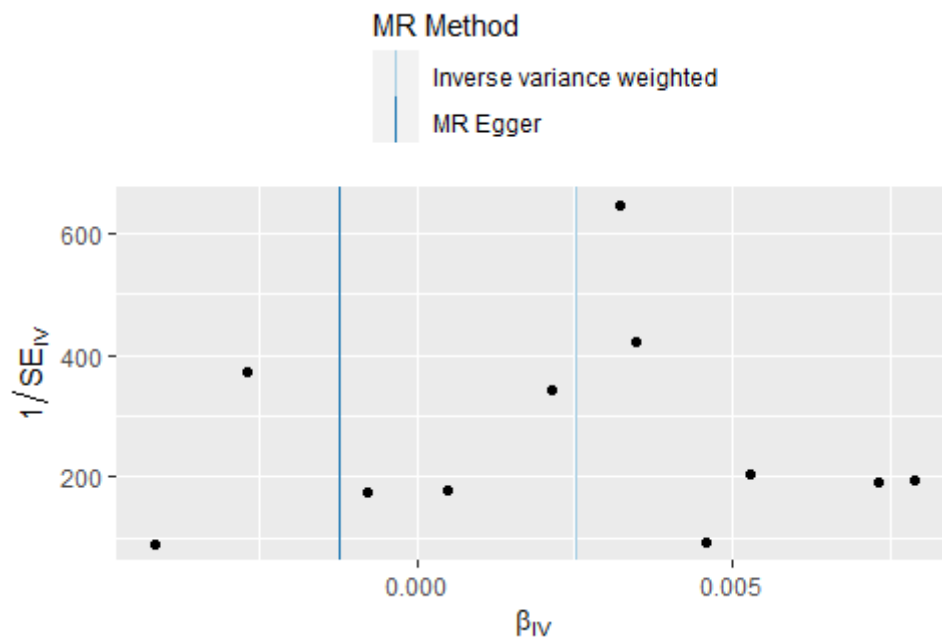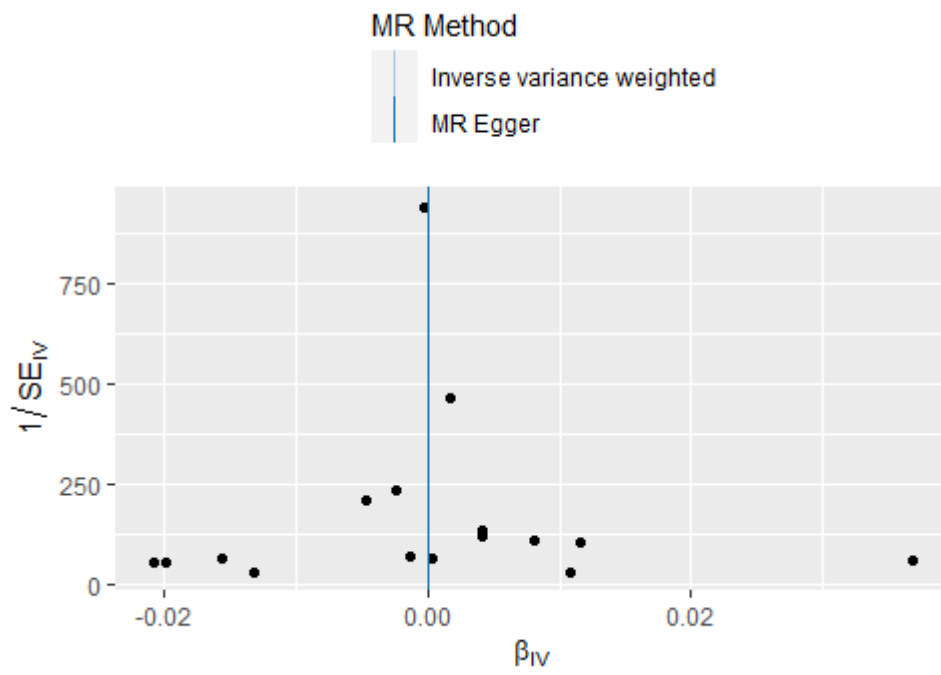

MR Method

- Inverse variance weighted
- MR Egger

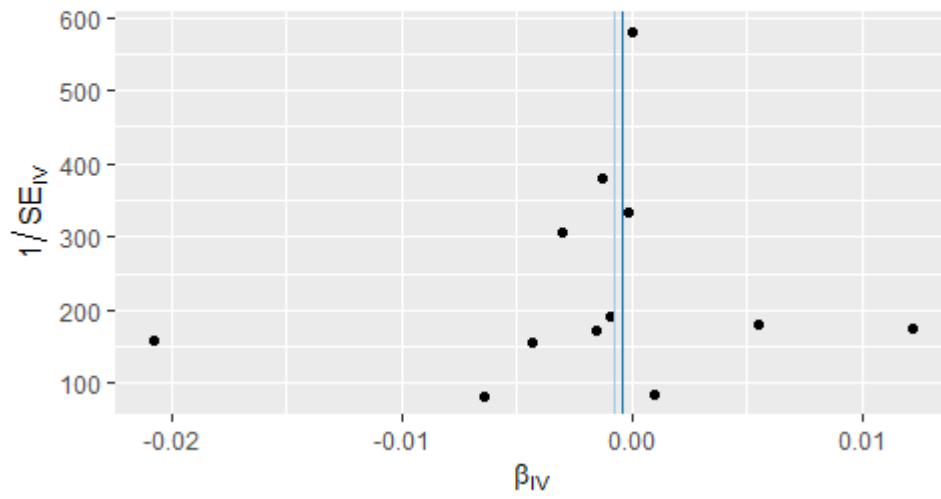

MR Method

- Inverse variance weighted
- MR Egger

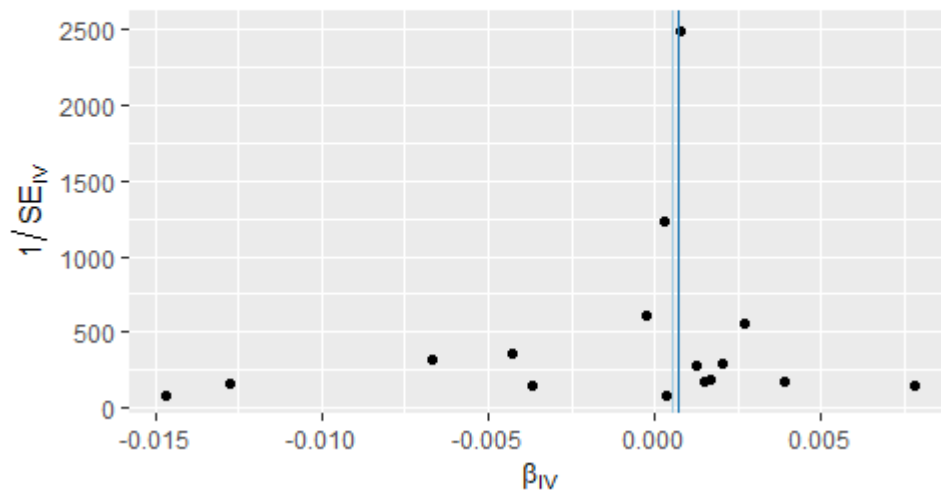

MR Method

- Inverse variance weighted
- MR Egger

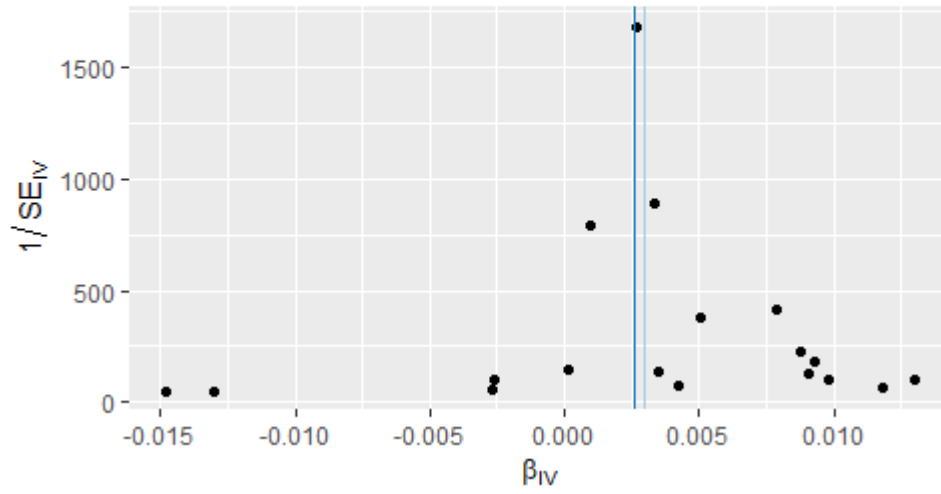

MR Method

- Inverse variance weighted
- MR Egger

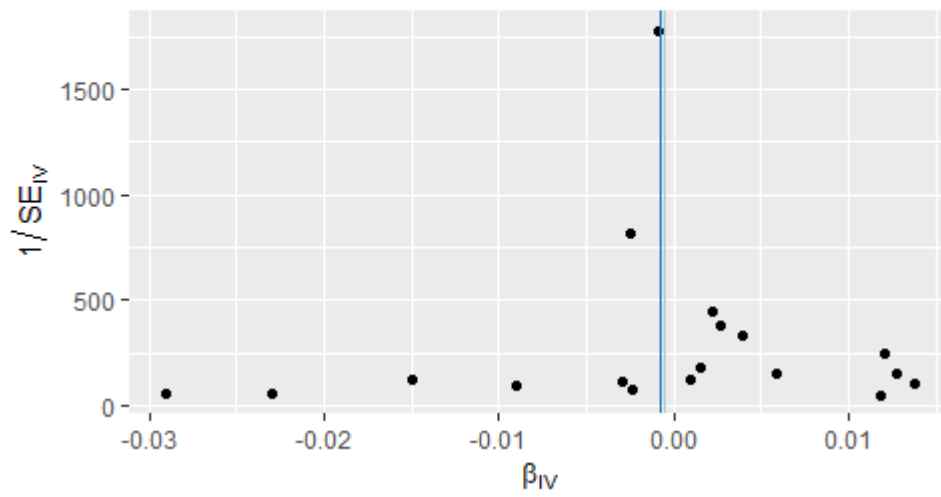

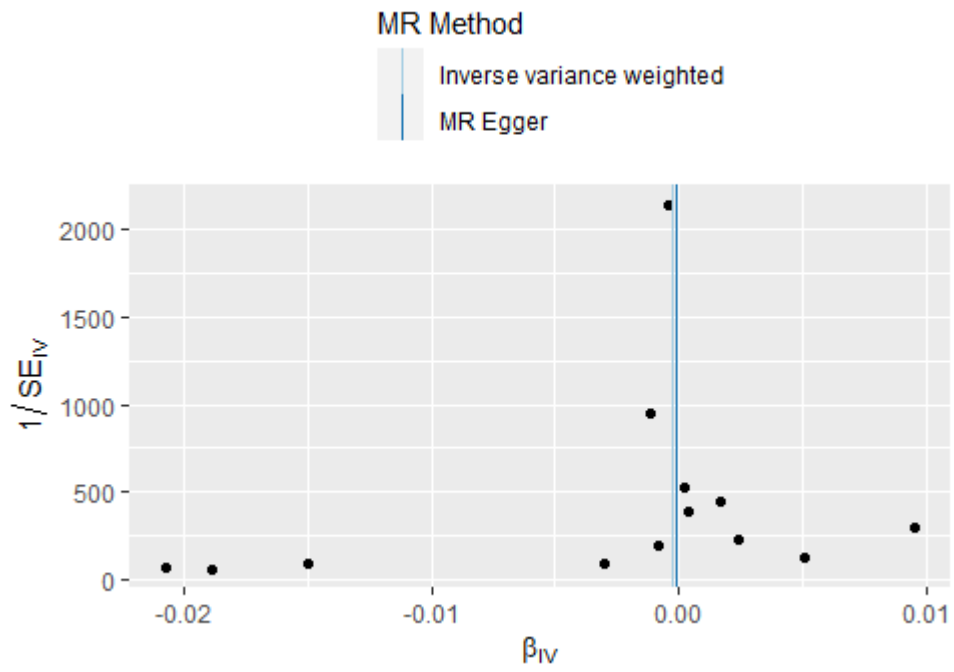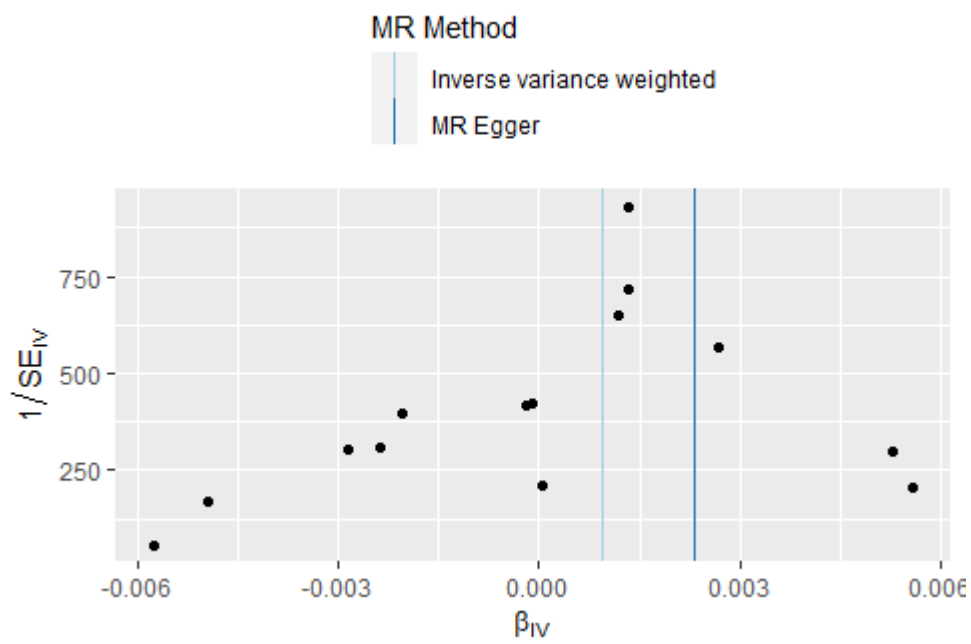

Supplement: 40001_2022_825_MOESM3_ESM.pdf [file 40001_2022_825_MOESM3_ESM.pdf]
