# Supplementary material for: The relationship between lipoprotein(a) and risk of cardiovascular disease: a Mendelian randomization analysis
Source: PubMed Central journal article supplement (PMC9608881; doi:10.1186/s40001-022-00825-6), 2022-10-27

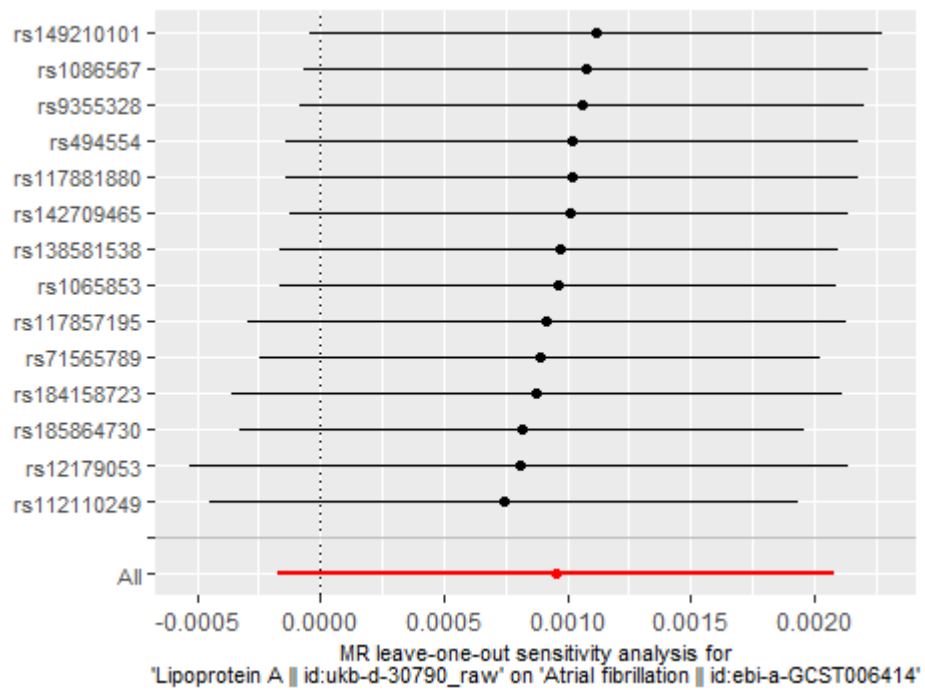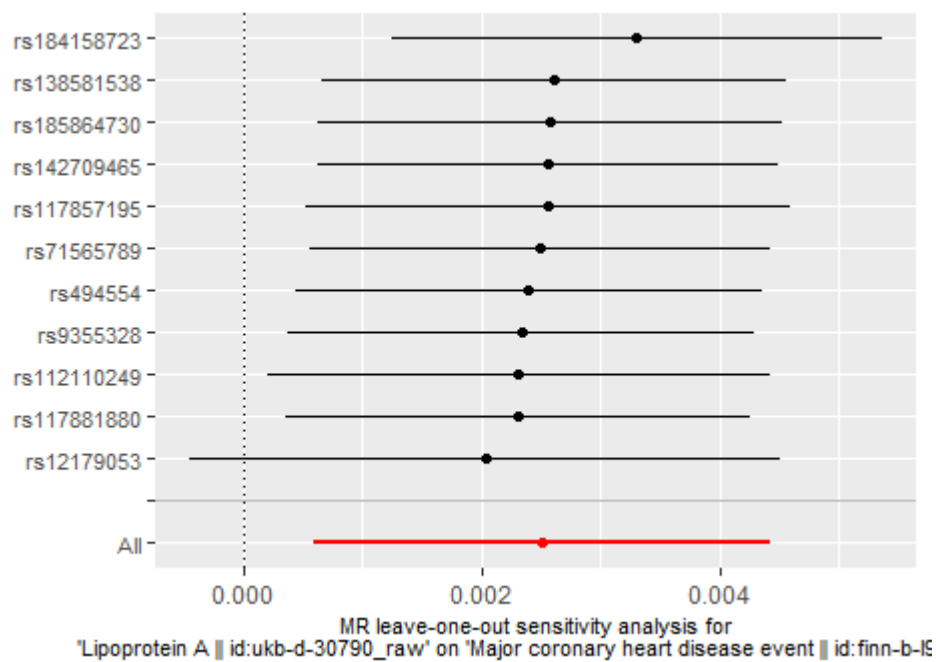

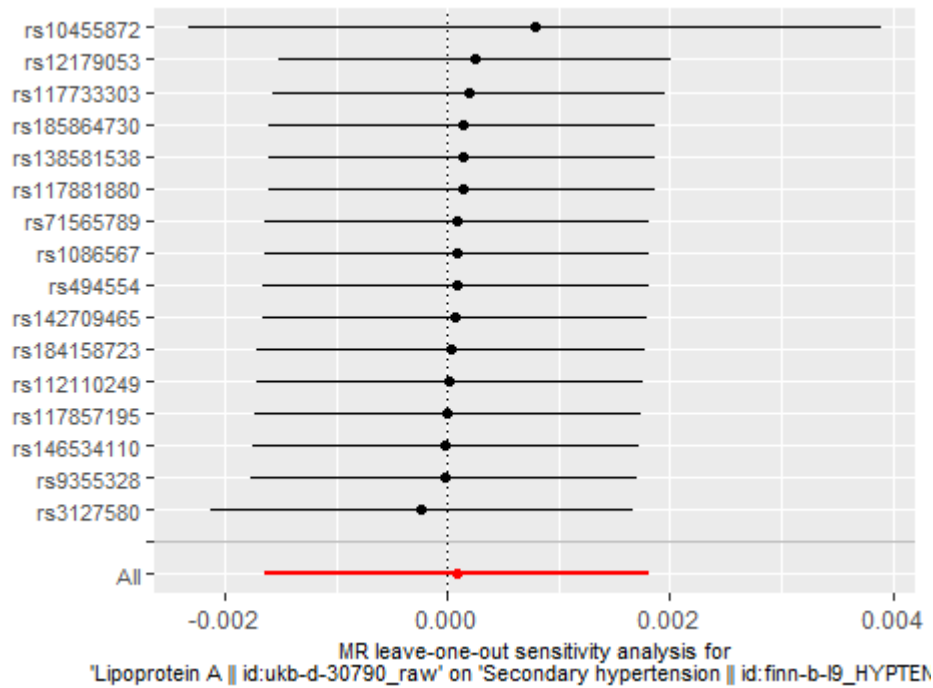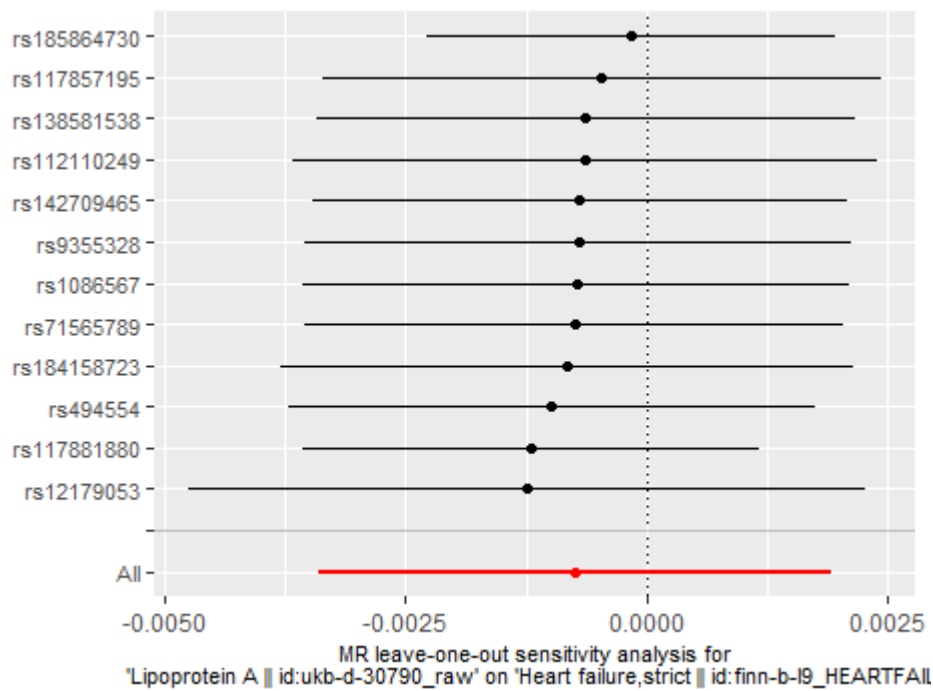

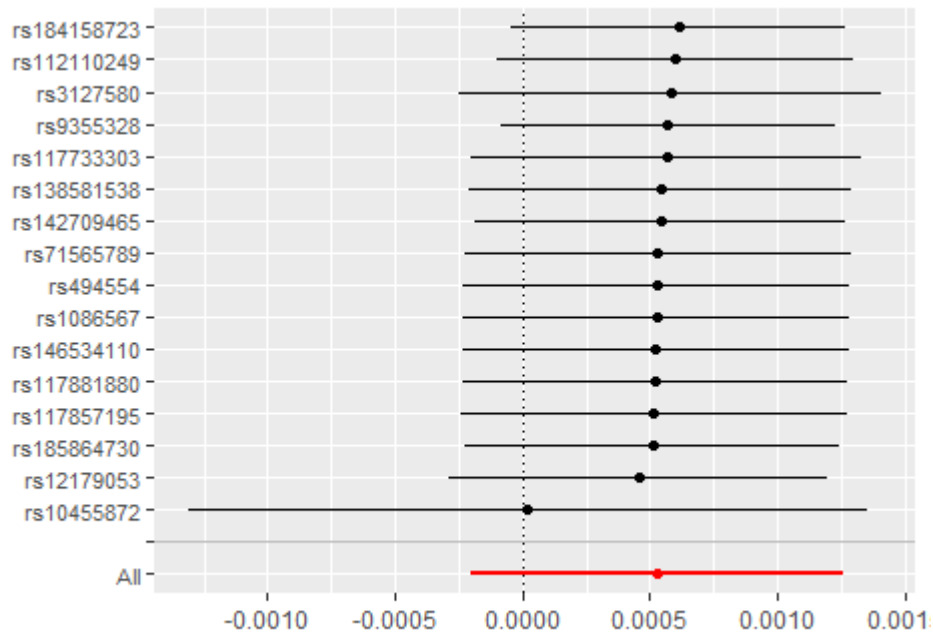

'Lipoprotein A || id:ukb-d-30790\_raw' on 'Ischaemic Stroke, excluding all haemorrhages || id:finn-b'

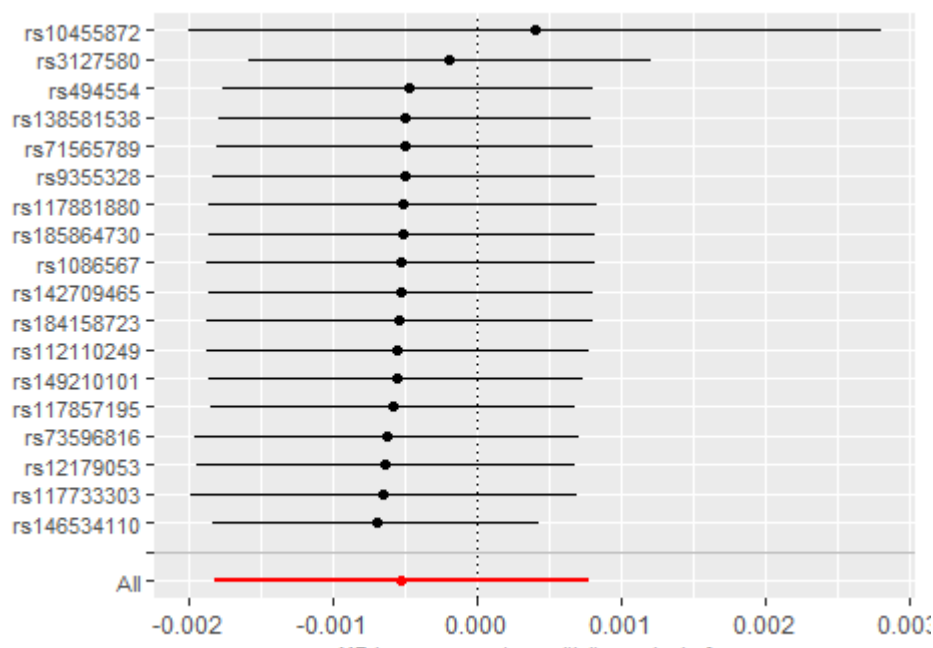

'Lipoprotein A || id:ukb-d-30790\_raw' on 'Ischemic stroke (small-vessel) || id:ebi-a-GCST01'

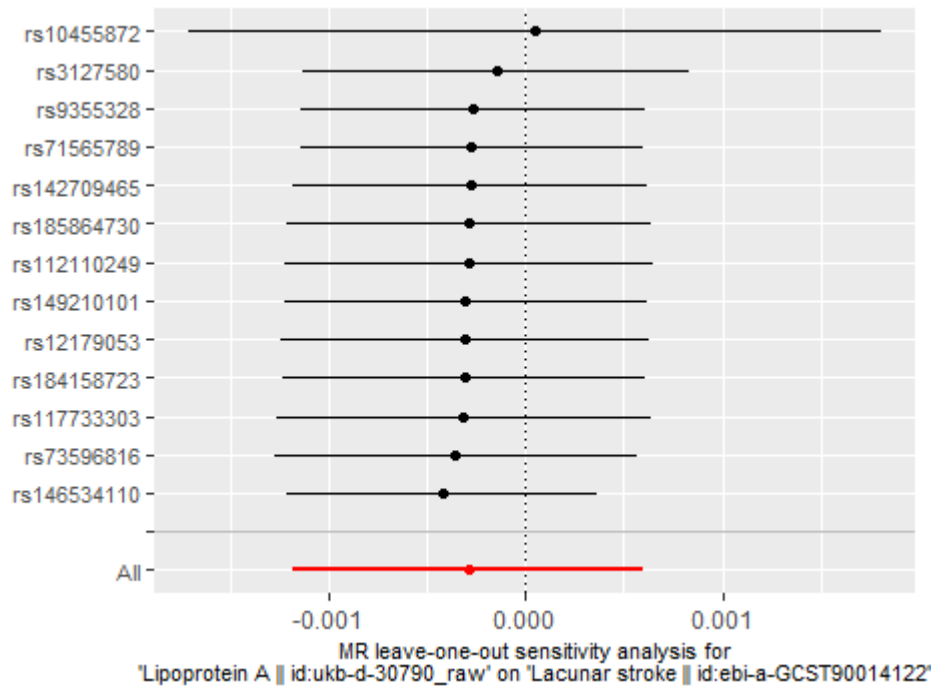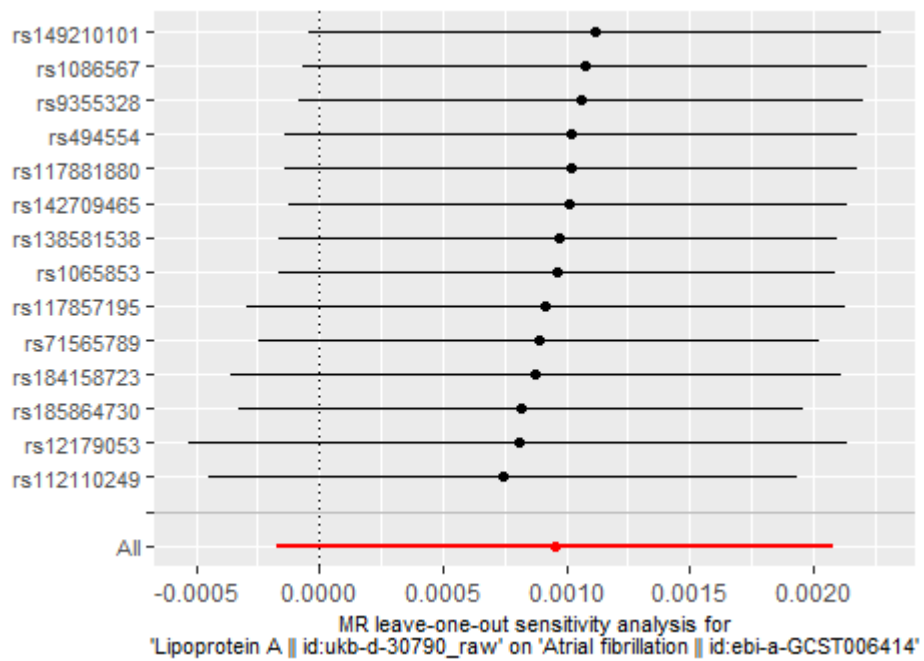

Supplement: 40001_2022_825_MOESM4_ESM.pdf [file 40001_2022_825_MOESM4_ESM.pdf]
